# Supplementary material for: Sucrose interferes with endogenous cytokinin homeostasis and expression of organogenesis-related genes during de novo shoot organogenesis in kohlrabi
Source: PubMed Central journal article supplement (PMC7985405; doi:10.1038/s41598-021-85932-w), 2021-03-22
Supplement: 41598_2021_85932_MOESM1_ESM.pdf [file 41598_2021_85932_MOESM1_ESM.pdf]

**Sucrose interferes with endogenous cytokinin homeostasis and expression of organogenesis-related genes during *de novo* shoot organogenesis in kohlrabi**

Tatjana Čosić, Václav Motyka, Jelena Savić, Martin Raspor, Marija Marković, Petre I. Dobrev, Slavica Ninković

**Supplementary Information**

**Supplementary Table S1.** Sequences of specific gene forward (F) and reverse (R) primers used in qPCR analysis.

| Gene           | GenBank™ access number | Primer sequence       |                         | Expected amplicon length |
|----------------|------------------------|-----------------------|-------------------------|--------------------------|
|                |                        | Forward (5' - 3')     | Reverse (5' - 3')       |                          |
| <i>PIN3</i>    | NM_105762.2            | TAAACCAGCGTGATCGGAAG  | ATTGTGCCCTTTGTGTTTGC    | 104 bp                   |
| <i>ARR5</i>    | NM_114679              | TCTATGCCTGGGATGACTGGA | TCACATCAGCTAATTTACAGGC  | 175 bp                   |
| <i>RGD3</i>    | NM_115288              | GACGTGGAGTCATCTAGGCA  | AGCCATCAGCGGCAAGATTA    | 162 bp                   |
| <i>CDKB2;1</i> | NM_106304              | GTACGAGCCAGCGAAACGAA  | GCAGCACACTAGAGATATGCTTG | 189 bp                   |
| <i>CYCB2;4</i> | NM_106281              | GCATCGGCGATCTACTACTGC | CCCTGCCTTGTGATGCAAAC    | 141 bp                   |
| <i>PoAc58</i>  | X55749                 | TGTTGGACTCTGGTGATGGTG | AGTAACCACGCTCAGTGAGGA   | 141 bp                   |
